# Supplementary material for: Catalytic oxidation of NO to NO2 for industrial nitric acid production using Ag-promoted MnO2/ZrO2 catalysts
Source: Royal Society of Chemistry journal article supplement (doi:10.1039/d2cy02178a), 2023-01-01
Supplement: d2cy02178a1.pdf [file d2cy02178a1.pdf]

## Supporting Information

# Catalytic Oxidation of NO to NO<sub>2</sub> for Nitric Acid Production Using Ag-Promoted MnO<sub>2</sub>/ZrO<sub>2</sub> Catalysts

Jithin Gopakumar,<sup>a</sup> Sunniva Vold,<sup>a</sup> Bjørn Christian Enger,<sup>b</sup> David Waller,<sup>c</sup> Per Erik Vullum,<sup>d</sup> and Magnus Rønning\*<sup>a</sup>

<sup>a</sup> Norwegian University of Science and Technology (NTNU), Department of Chemical Engineering, Sem Sælands vei 4, NO-7491 Trondheim, Norway

<sup>b</sup> SINTEF Industry, Kinetic, and Catalysis group, P.O. Box 4760 Torgarden, NO-7465 Trondheim, Norway

<sup>c</sup> YARA Technology Center, Herøya Forskningspark, Bygg 92, Hydrovegen 67, NO-3936 Porsgrunn, Norway

<sup>d</sup> SINTEF Industry, Materials and Nanotechnology, P.O. Box 4760 Torgarden, NO-7465 Trondheim, Norway

\*Corresponding author; E-mail address: magnus.ronning@ntnu.no (M. Rønning)

## S1 Gas-phase conversion

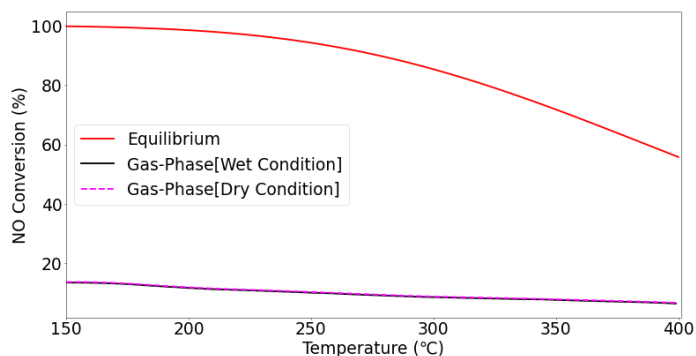

Fig. S1 Gas-phase NO to NO<sub>2</sub> conversion (%) as a function of temperature in both dry (10% NO, 6% O<sub>2</sub> and rest Ar) and wet conditions (10% NO, 6% O<sub>2</sub>, 15% H<sub>2</sub>O and rest Ar) heated at a rate of 5 °C/min at WHSV= 24,000 Ncm<sup>3</sup>/g<sub>cat</sub>h

## S2 Zirconia supported silver conversion

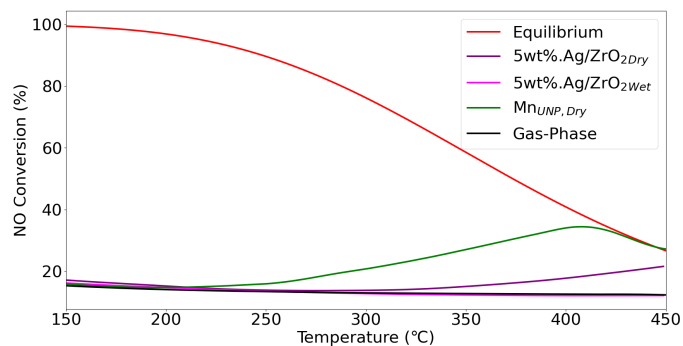

Fig. S2 NO to NO<sub>2</sub> conversion (%) as a function of temperature in dry (10% NO, 6% O<sub>2</sub> and rest Ar) and wet (10% NO, 6% O<sub>2</sub>, 15% H<sub>2</sub>O and rest Ar) conditions with 5wt.% Ag supported on ZrO<sub>2</sub> in comparison to Mn<sub>UNP</sub> catalyst in dry (10% NO, 6% O<sub>2</sub> and rest Ar) conditions heated at a rate of 5 °C/min at WHSV= 24,000 Ncm<sup>3</sup>/g<sub>cat</sub>h

5wt.% Ag on ZrO<sub>2</sub> support were prepared by incipient wetness impregnation. The BET surface area was found to be 69m<sup>2</sup>/g. From Fig. S2 it is clear that supported Ag alone have very low NO conversion levels compared to zirconia supported manganese catalysts in the measured temperature range.

## S3 Short isothermal run

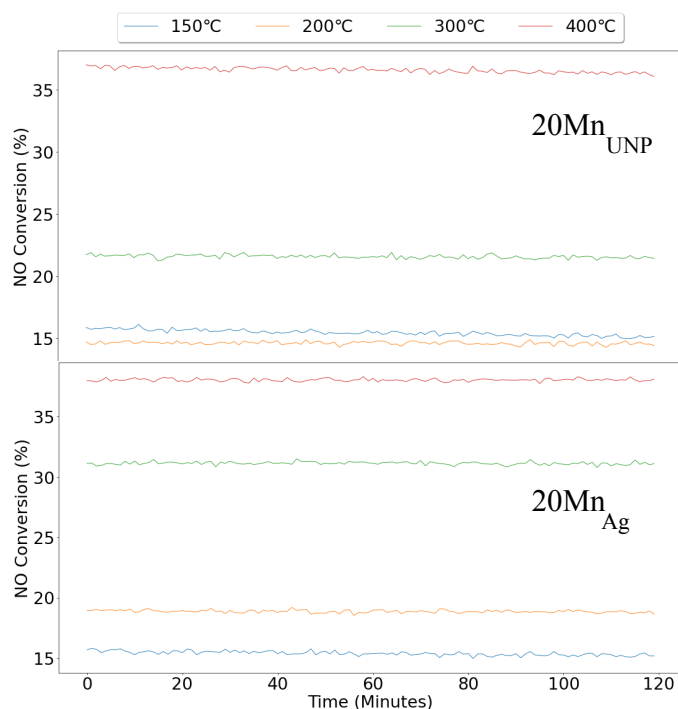

Fig. S3 NO to NO<sub>2</sub> conversion (%) at 150 °C, 200 °C, 300 °C and 400 °C in wet conditions (10% NO, 6% O<sub>2</sub>, 15% H<sub>2</sub>O and rest Ar) at WHSV= 24,000 Ncm<sup>3</sup>/g<sub>cat</sub>h

## S4 In-situ XAS experiment programme

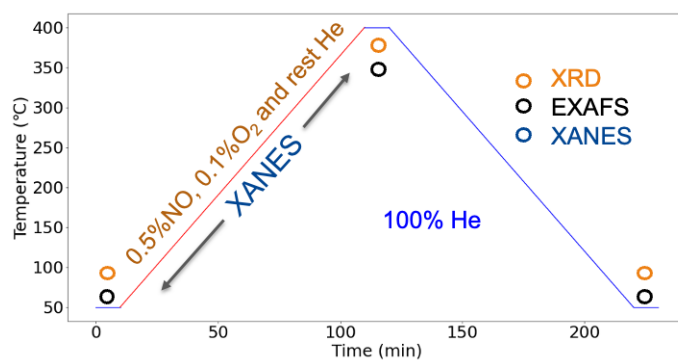

Fig. S4 In-situ XAS experiment programme at Mn K Edge with dry NO oxidation temperature scan from 50-400 °C at 5 °C/min rate in 0.5%NO, 0.1%O<sub>2</sub> and He balance at WHSV= 24,000 Ncm<sup>3</sup>/g<sub>cat</sub>h

## S5 XAS $\chi^2$ data

Fig. S5 displays  $\chi^2$  as a function of wavelength for MnO<sub>2</sub> standard, Mn<sub>UNP</sub> and Mn<sub>Ag</sub> fresh catalysts. The signal-to-noise ratio of EXAFS measured (Mn<sub>UNP</sub> and Mn<sub>Ag</sub> fresh catalysts) in fluorescence mode is higher when compared to the EXAFS (Mn<sup>4+</sup> - MnO<sub>2</sub> standard) measured in transmission.

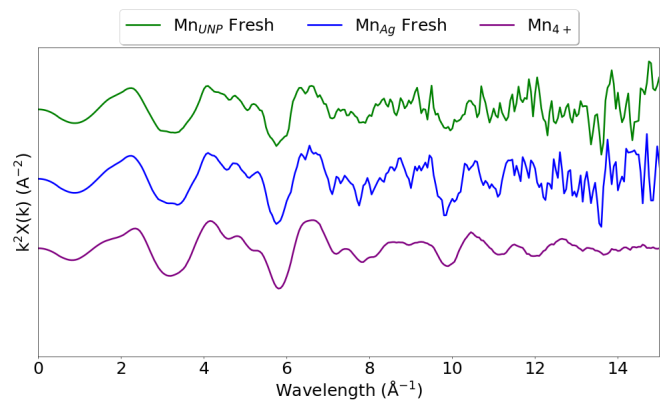

Fig. S5 EXAFS  $\chi^2$  as a function of wavelength for  $MnO_2$  standard (measured in transmission mode),  $Mn_{UNP}$  and  $Mn_{Ag}$  fresh catalysts (measured in fluorescence mode)

## S6 Silver edge XANES profiles

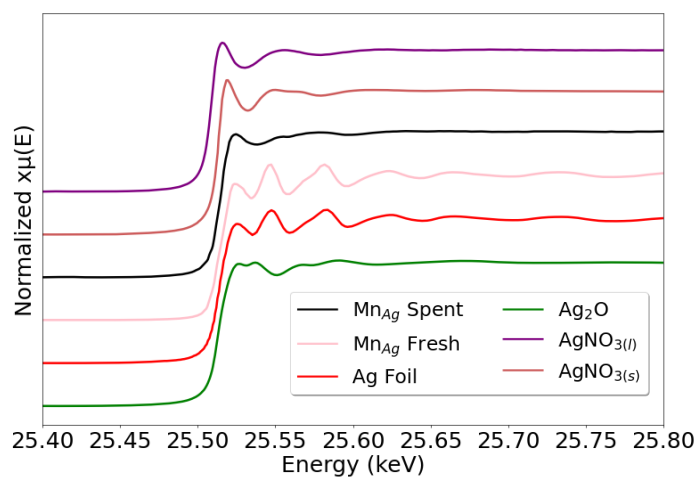

Fig. S6  $Mn_{Ag}$  fresh and spent sample after wet NO oxidation at 400 °C isothermal conditions (10% NO, 6%  $O_2$ , 15%  $H_2O$  and rest Ar) at  $WHSV = 24,000 \text{ Ncm}^3/\text{g}_{cat}h$ , showing *ex-situ* XANES profile compared with different Ag standards collected at the Ag K edge

## S7 Simulated equilibrium composition

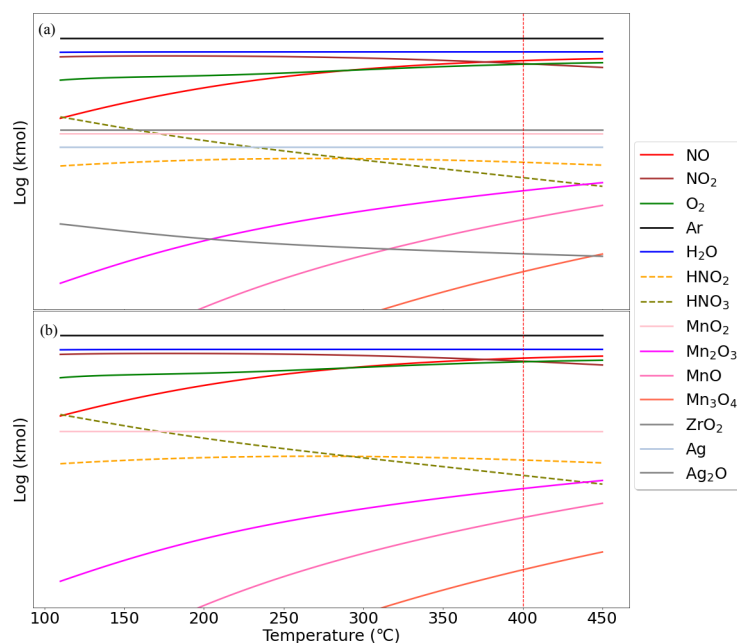

Fig. S7 HSC software simulated equilibrium composition changes for 10% NO, 6%  $O_2$ , 15%  $H_2O$  and rest Ar with respect to temperature for both (a)  $Mn_{Ag}$  and (b)  $Mn_{UNP}$  catalysts

Fig. S7 presents simulated equilibrium composition changes for 10% NO, 6%  $O_2$ , 15%  $H_2O$  and rest Ar with respect to temperature for both  $Mn_{Ag}$  and  $Mn_{UNP}$  catalysts. For equilibrium composition simulation, HSC 9 software for windows was used<sup>38</sup>.

## S8 TEM-EDX EELS analysis

This section presents EEL spectra for  $Mn_{Ag}$  subjected to longer iso-thermal run at 400 °C. The spectrum is collected from a small region that does not overlap with any  $ZrO_2$ . Also, the O K-peak plots have been omitted, and only Mn  $L_{2,3}$  edges plots are presented.

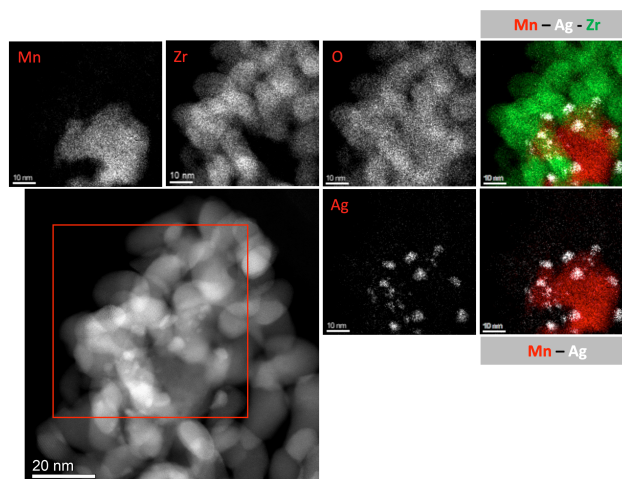

Fig. S8 MAP 1: TEM-EDX image of the spent  $Mn_{Ag}$  catalyst sample after 72hrs isothermal wet NO oxidation at 400 °C (10% NO, 6%  $O_2$ , 15%  $H_2O$  and rest Ar) at  $WHSV = 24,000 \text{ Ncm}^3/\text{g}_{cat}h$  with corresponding EDX elemental-mapping.  $\square$  represents mapped region.

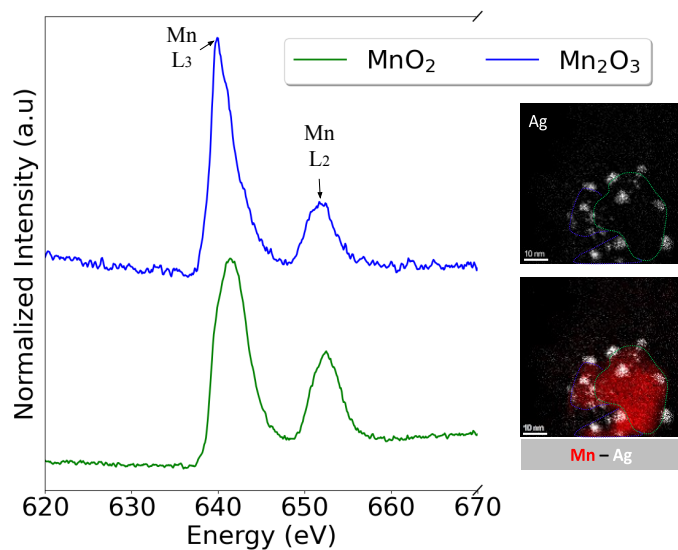

Fig. S9 EEL spectra obtained for TEM-EDX image presented in Fig. S8 at Mn L<sub>2,3</sub> edges (vertically displaced for more clarity). The presence of both MnO<sub>2</sub> and Mn<sub>2</sub>O<sub>3</sub> were found in the mapped region.

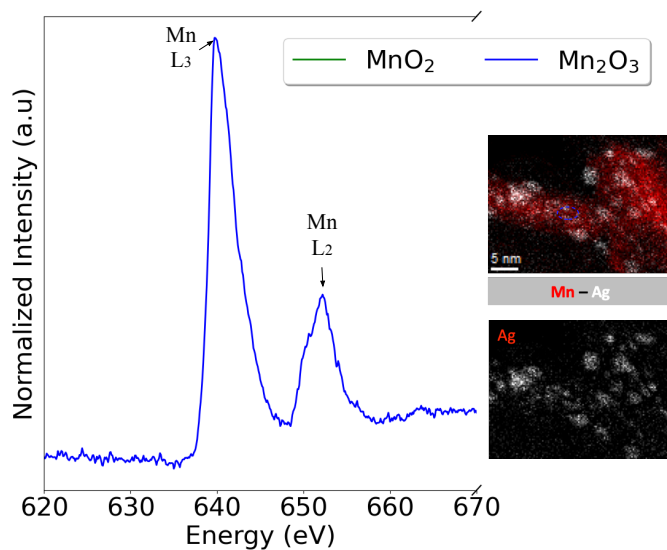

Fig. S11 EEL spectra obtained for TEM-EDX image presented in Fig. S10 at Mn L<sub>2,3</sub> edges. The presence of only Mn<sub>2</sub>O<sub>3</sub> was found in the mapped region.

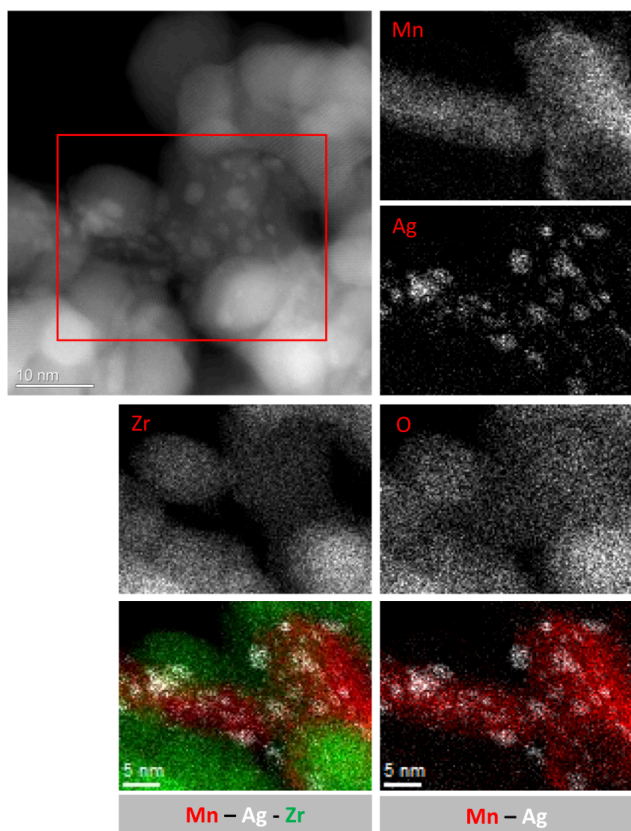

Fig. S10 MAP 2:TEM image of the spent Mn<sub>Ag</sub> catalyst sample after 72hrs isothermal wet NO oxidation at 400 °C (10% NO, 6% O<sub>2</sub>, 15% H<sub>2</sub>O and rest Ar) at WHSV= 24,000 Ncm<sup>3</sup>/g<sub>cat</sub>h with corresponding EDX elemental-mapping. □ represents mapped region

## S9 R space EXAFS

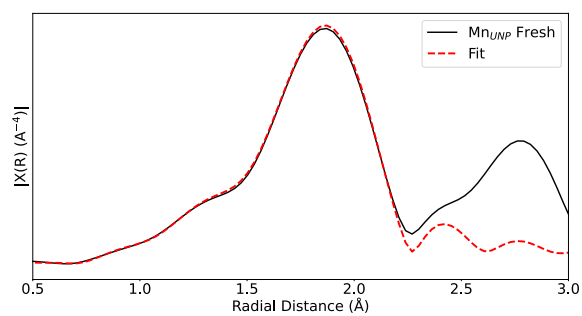

Mn<sub>UNP</sub> fresh [-] catalyst sample

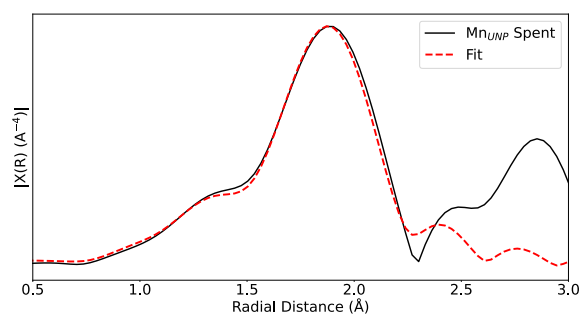

Mn<sub>UNP</sub> spent [-] catalyst sample

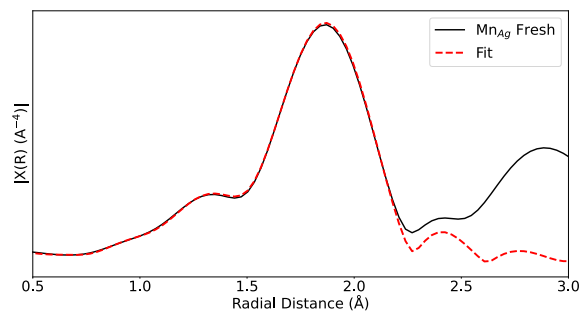

Mn<sub>Ag</sub> fresh [-] catalyst sample

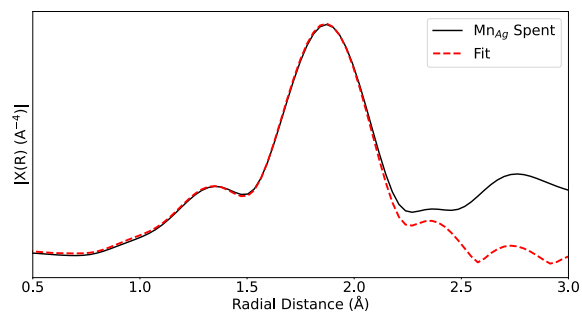

Mn<sub>Ag</sub> spent [-] catalyst sample

Fig. S12 R space EXAFS fits for fresh and spent catalyst samples of Mn<sub>UNP</sub> and Mn<sub>Ag</sub> after dry NO oxidation [—Data and - - Fit]
